# Supplementary material for: Hybrid nanocomposite as a chest wall graft with improved integration by adipose-derived stem cells
Source: PubMed Central journal article supplement (PMC6662805; doi:10.1038/s41598-019-47441-9), 2019-07-29
Supplement: 41598_2019_47441_MOESM1_ESM.pdf [file 41598_2019_47441_MOESM1_ESM.pdf]

## Supporting Information

### **Hybrid nanocomposite as a chest wall graft with improved integration by adipose-derived stem cells**

Johanna Buschmann, Ph.D.<sup>\*#1</sup>, Yoshito Yamada, M.D.<sup>#2</sup>, Konstantin Schulz-Schönhagen<sup>#3</sup>, Samuel C. Hess, Ph.D.<sup>3</sup>, Wendelin J. Stark, Ph.D.<sup>3</sup>, Christine Opelz<sup>2</sup>, Gabriella Meier Bürgisser<sup>1</sup>, Walter Weder, M.D.<sup>2</sup>, Wolfgang Jungraithmayr, M.D., Ph.D.<sup>2,4</sup>

<sup>#</sup> These authors contributed equally to the study.

<sup>1</sup>Division of Plastic and Hand Surgery, University Hospital Zurich, Switzerland

<sup>2</sup>Division of Thoracic Surgery, University Hospital Zurich, Switzerland

<sup>3</sup>Institute for Chemical and Bioengineering, Department of Chemistry and Applied Biosciences, ETH Zurich, CH-8093 Zurich, Switzerland

<sup>4</sup>Department of Thoracic Surgery, University Hospital Rostock, Rostock, Germany

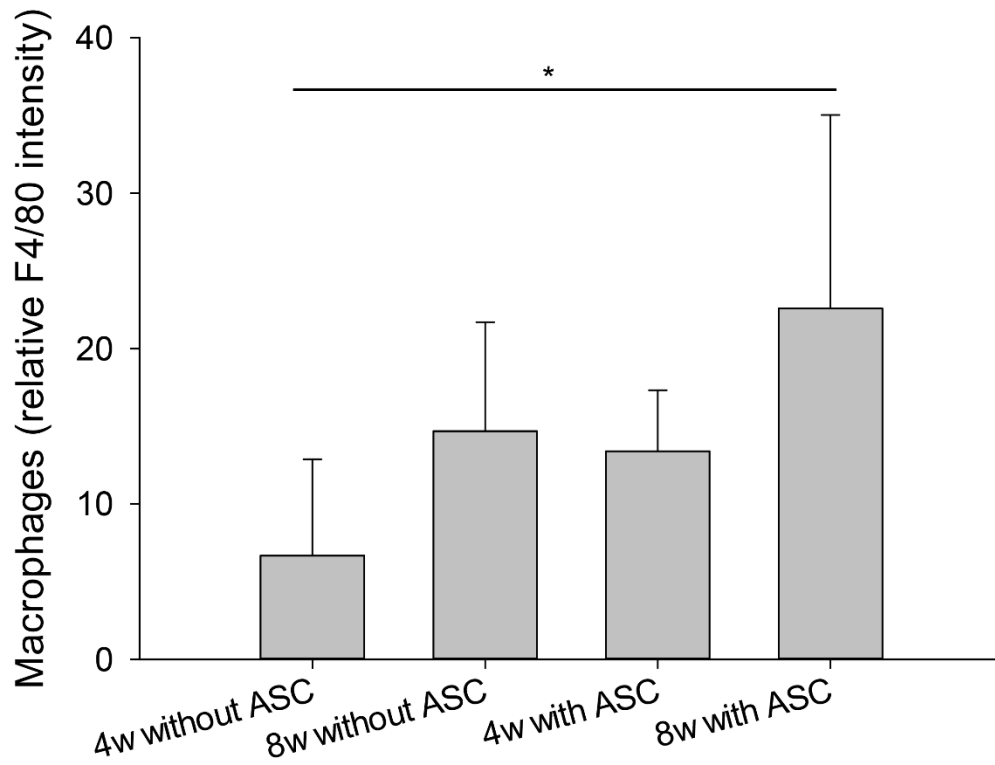

**Figure S1:** Inflammatory response: macrophages. Percentage of **F4/80+ macrophages** as compared to total cell densities. Key: 4w = 4 weeks; 8w = 8 weeks.
